# Supplementary material for: An Anomalous Type IV Secretion System in Rickettsia Is Evolutionarily Conserved
Source: PubMed Central journal article supplement (PMC2653234; doi:10.1371/journal.pone.0004833), 2009-03-12
Supplement: pone.0004833.s009.pdf [file pone.0004833.s009.pdf]

### RvhB3

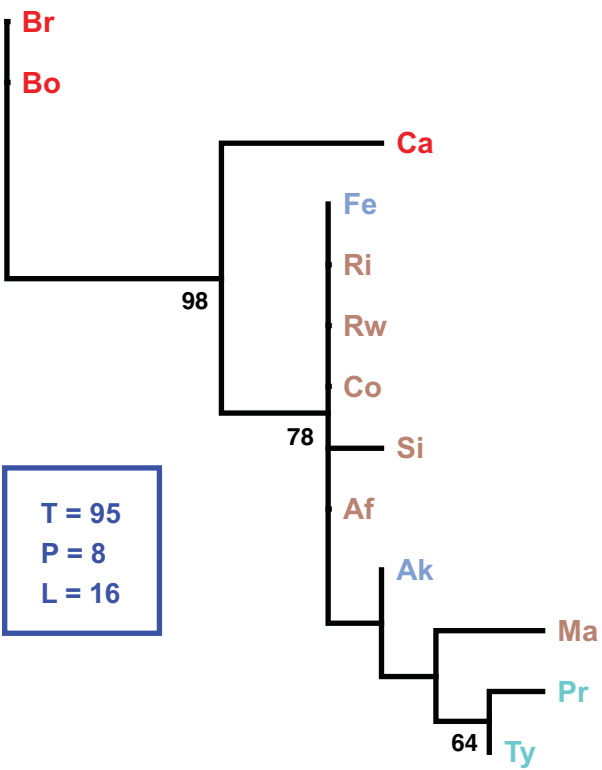

T = 95  
P = 8  
L = 16

— 0.5 aa changes

### *rvhB3*

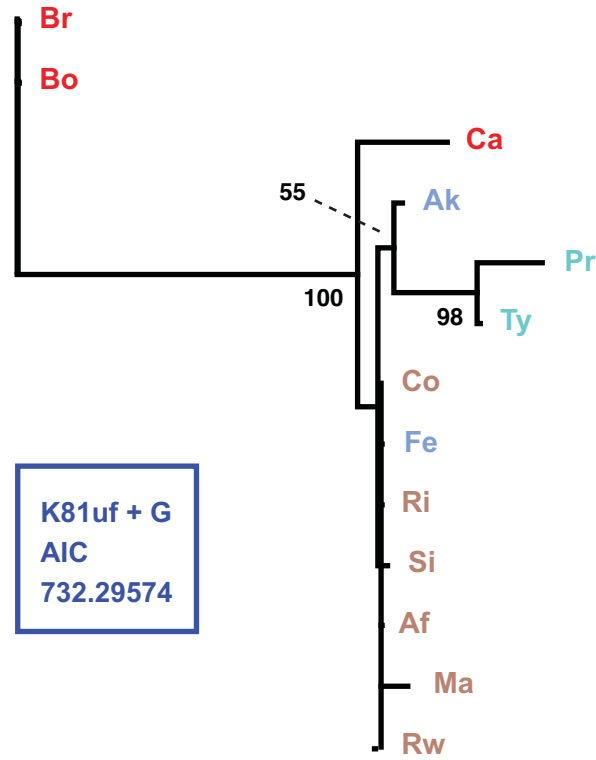

K81uf + G  
AIC  
732.29574

— 0.01 substitutions/site

### RvhB4a

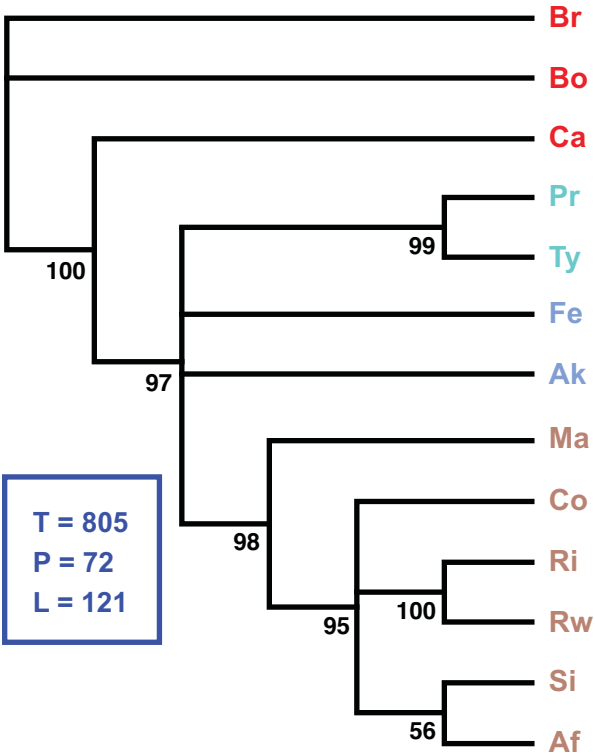

T = 805  
P = 72  
L = 121

Strict consensus (4)

### *rvhB4a*

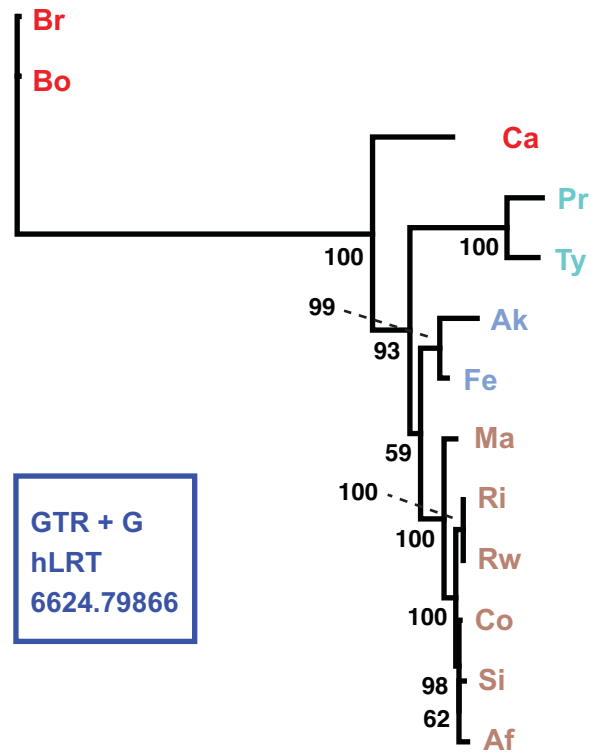

GTR + G  
hLRT  
6624.79866

— 0.01 substitutions/site

### RvhB4b

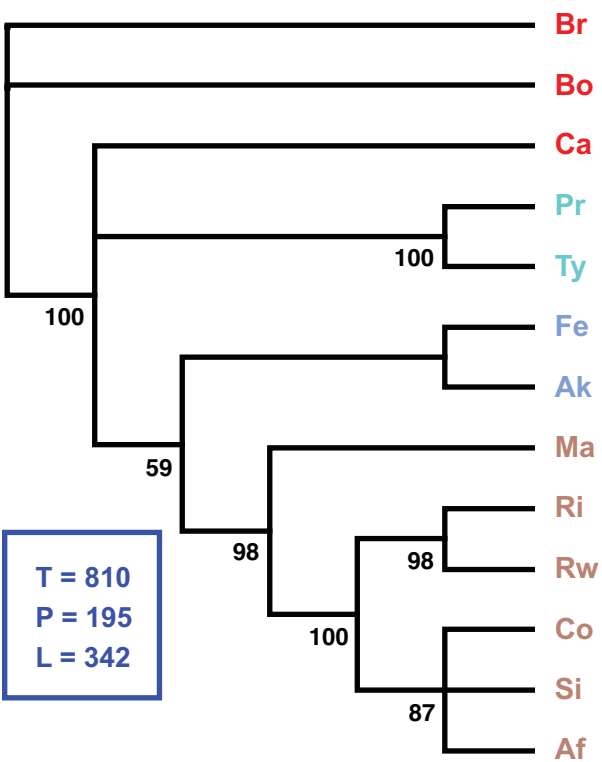

Strict consensus (2)

### *rvhB4b*

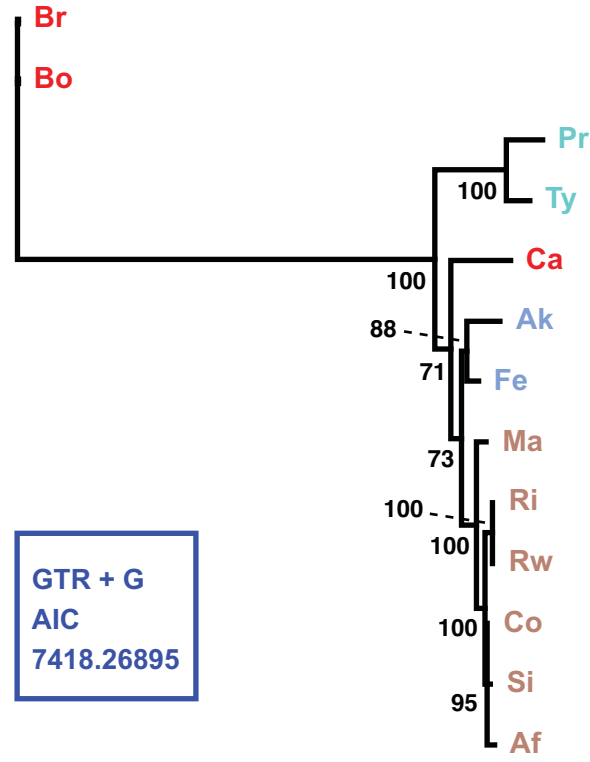

— 0.01 substitutions/site

### RvhB6a

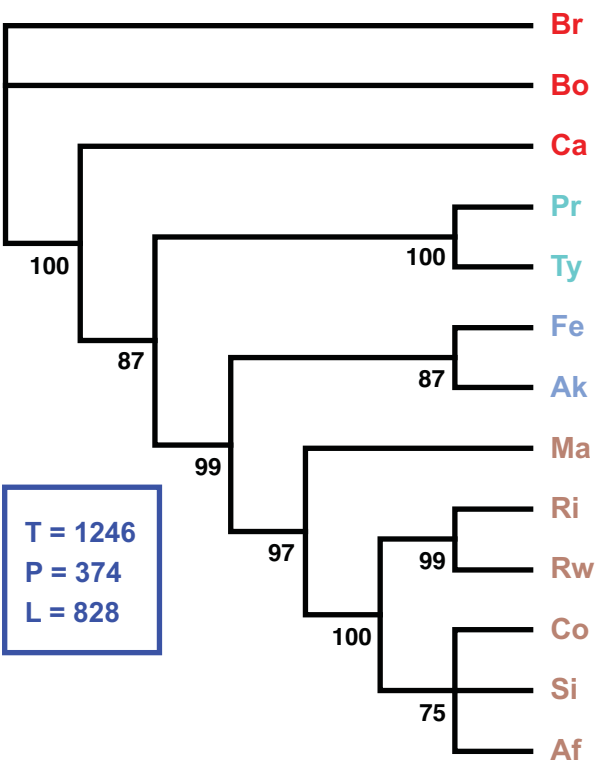

Strict consensus (4)

### *rvhB6a*

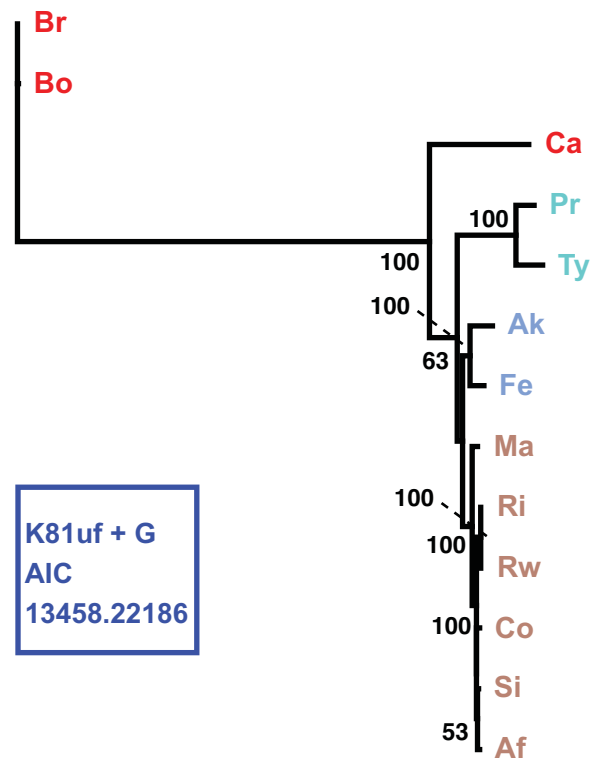

— 0.05 substitutions/site

### RvhB6b

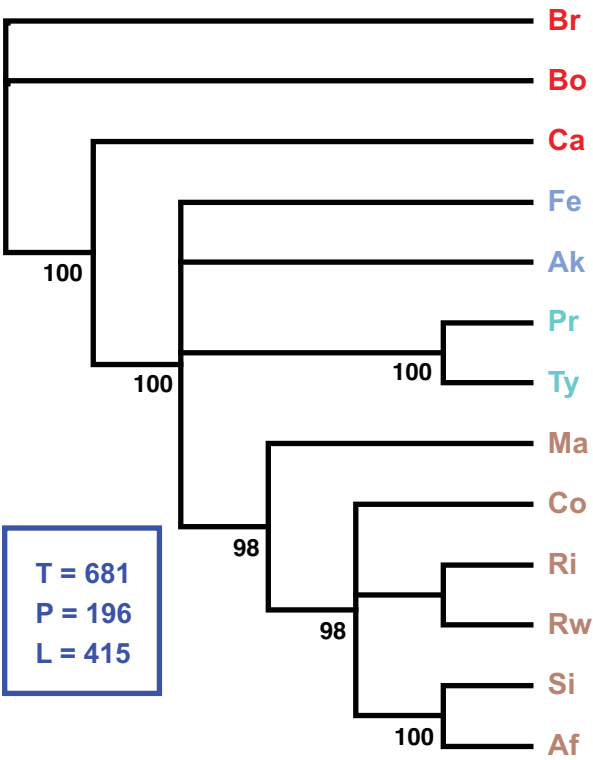

Strict consensus (6)

### *rvhB6b*

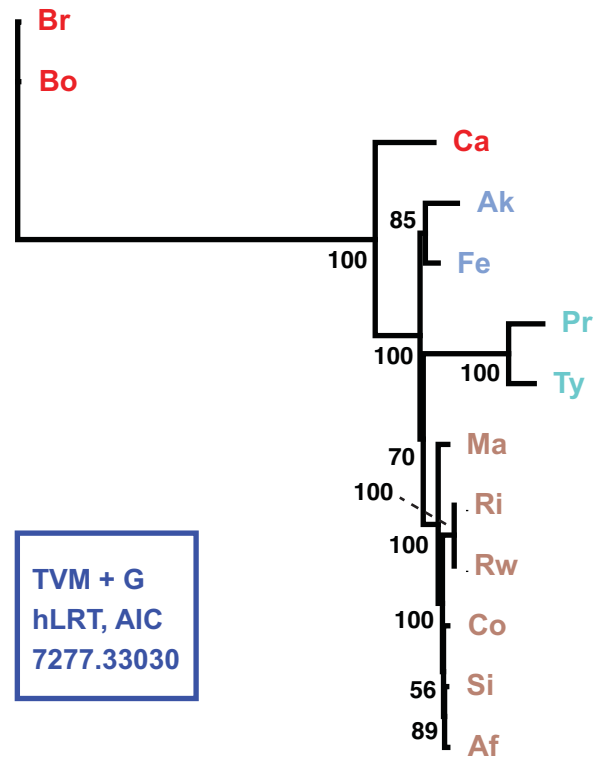

— 0.05 substitutions/site

### RvhB6c

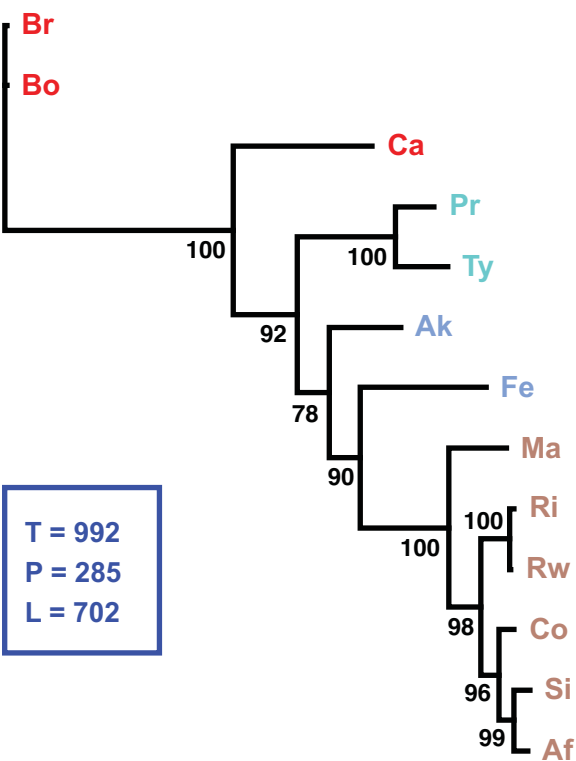

— 50 aa changes

### *rvhB6c*

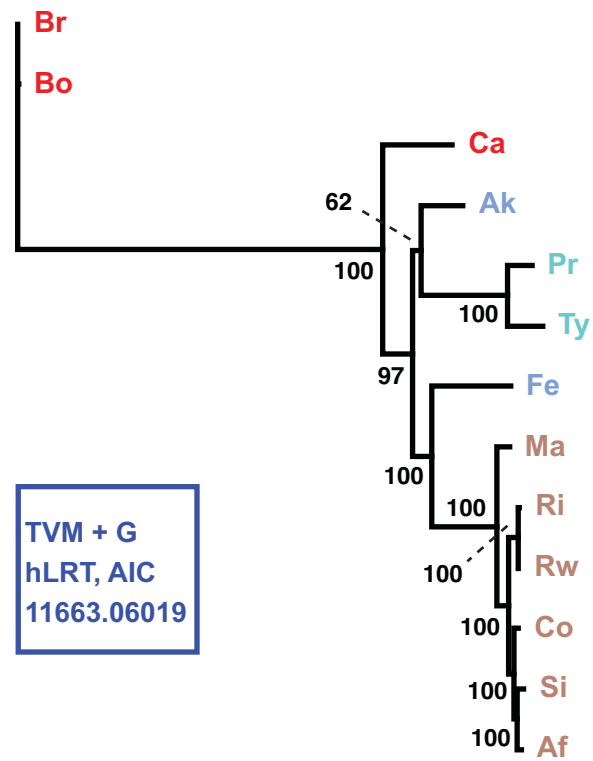

— 0.05 substitutions/site

### RvhB6d

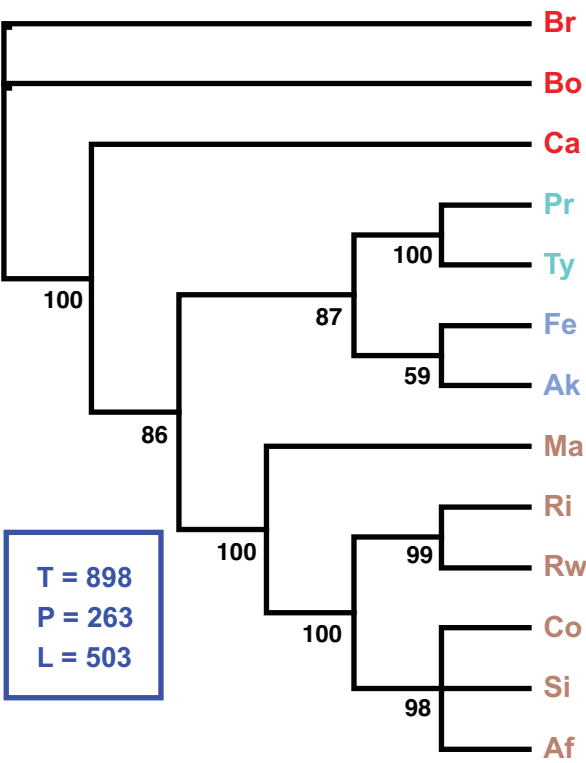

Strict consensus (2)

### *rvhB6d*

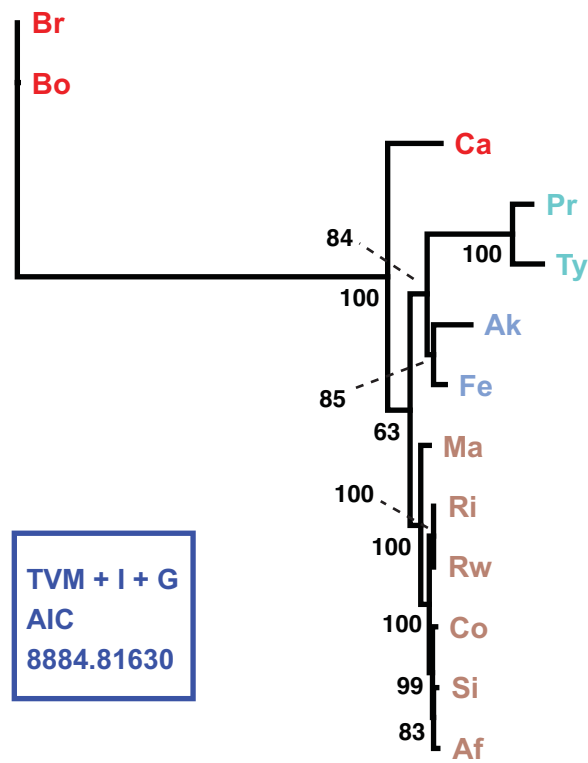

- 0.01 substitutions/site

### RvhB6e

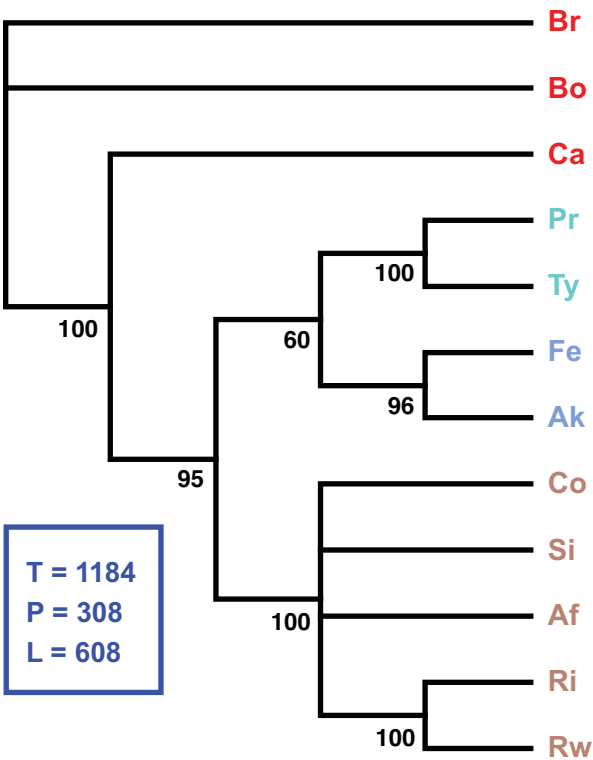

Strict consensus (5)

### *rvhB6e*

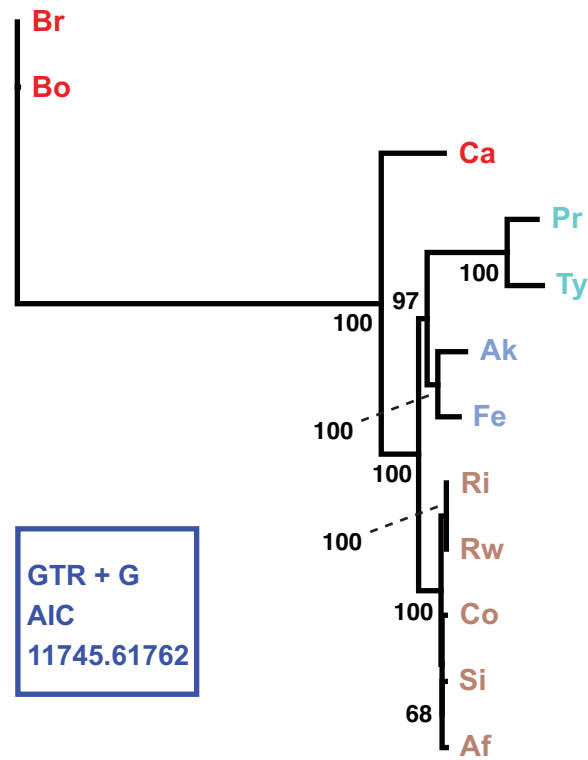

— 0.05 substitutions/site

### RvhB8a

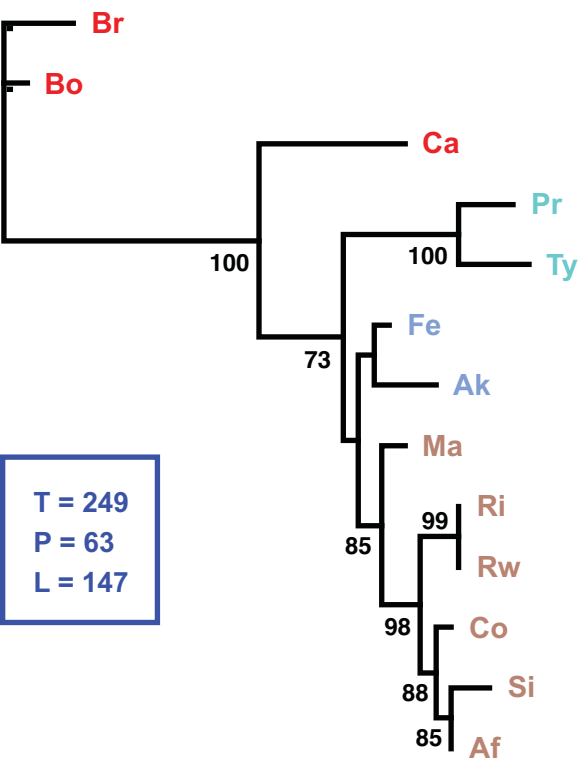

T = 249  
P = 63  
L = 147

— 5 aa changes

### *rvhB8a*

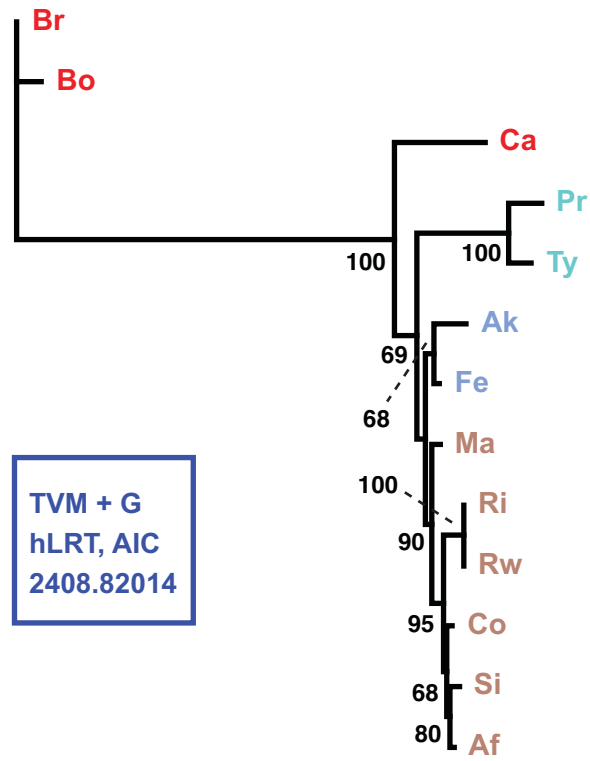

TVM + G  
hLRT, AIC  
2408.82014

— 0.01 substitutions/site

### RvhB8b

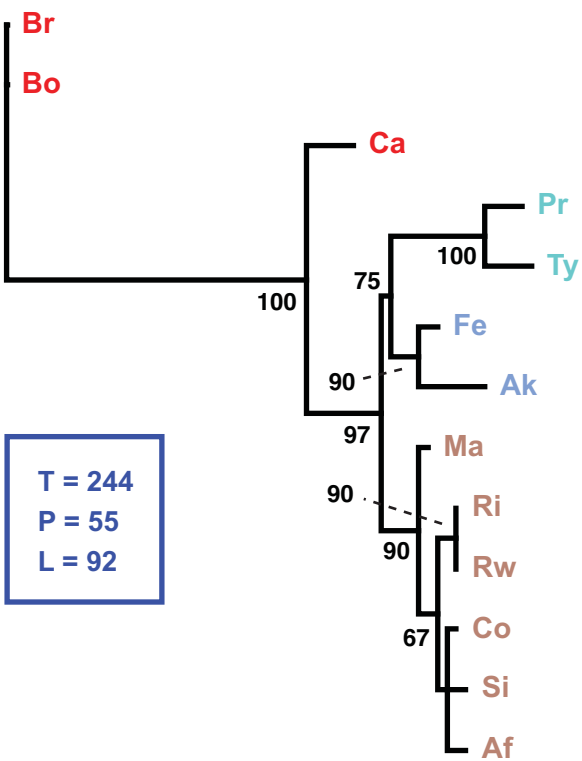

T = 244  
P = 55  
L = 92

— 5 aa changes

### *rvhB8b*

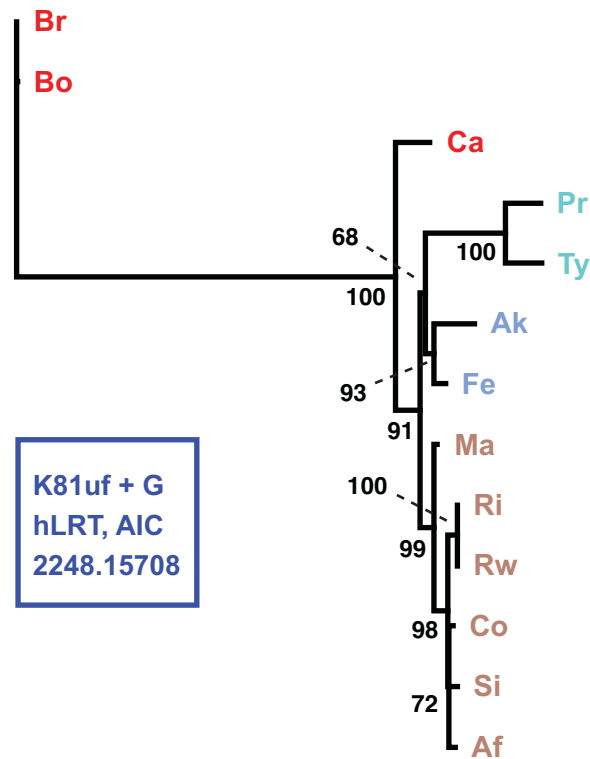

K81uf + G  
hLRT, AIC  
2248.15708

— 0.01 substitutions/site

### RvhB9a

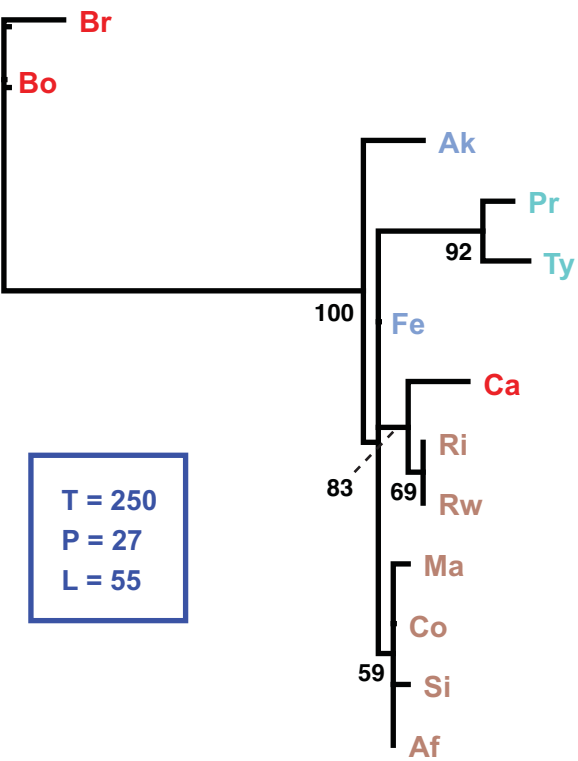

— 1 aa change

### *rvhB9a*

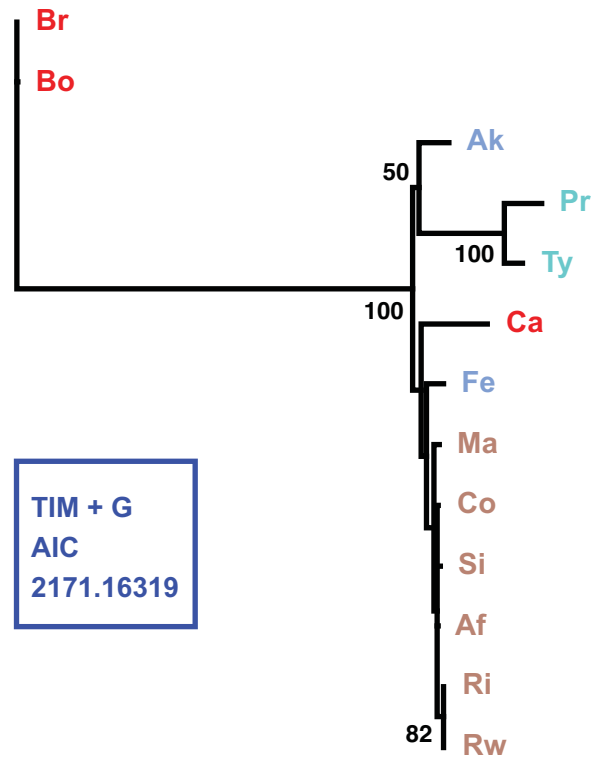

— 0.01 substitutions/site

### RvhB9b

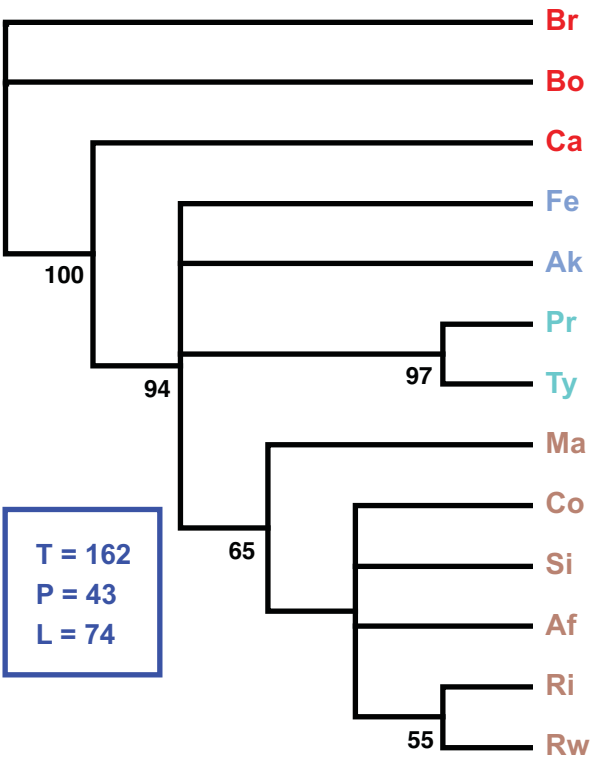

Strict consensus (5)

### *rvhB9b*

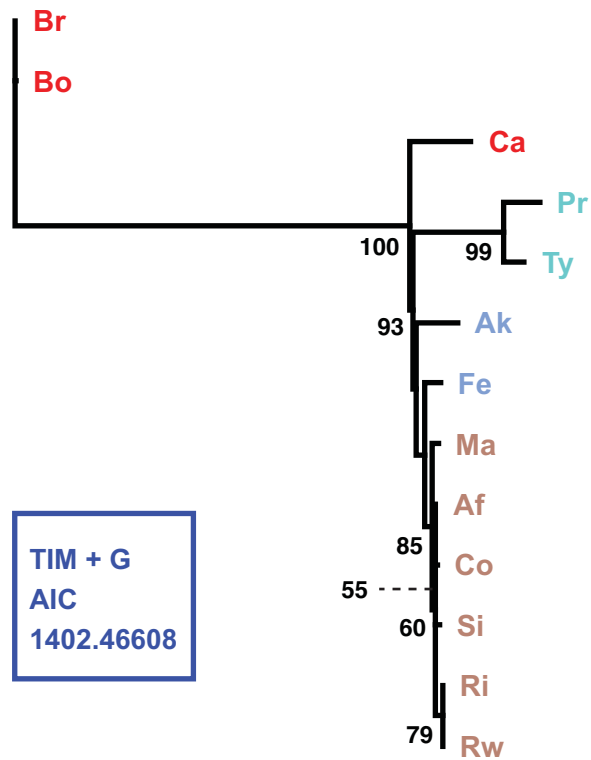

— 0.01 substitutions/site

### RvhB10

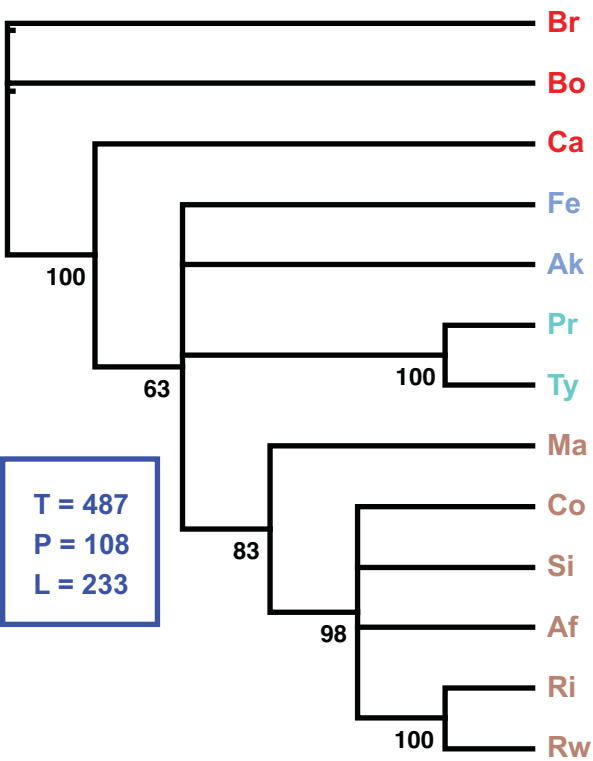

T = 487  
P = 108  
L = 233

Strict consensus (12)

### *rvhB10*

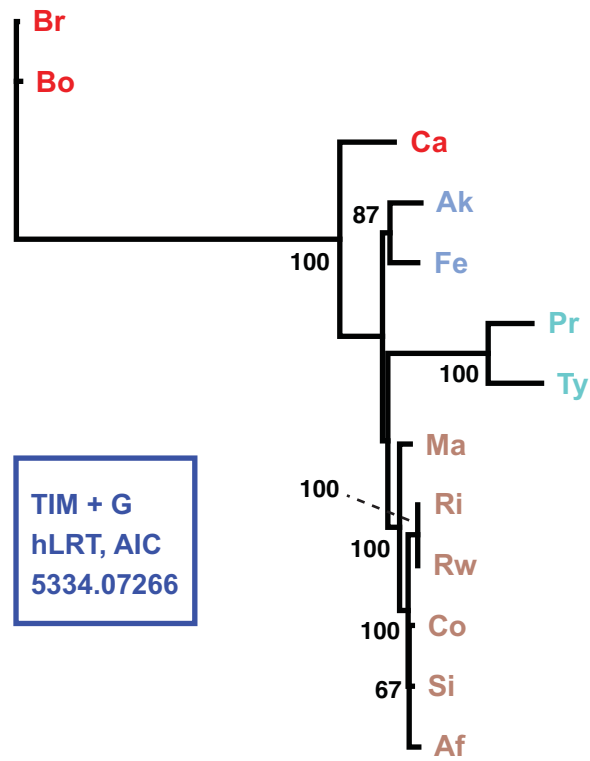

TIM + G  
hLRT, AIC  
5334.07266

— 0.05 substitutions/site

### RvhB11

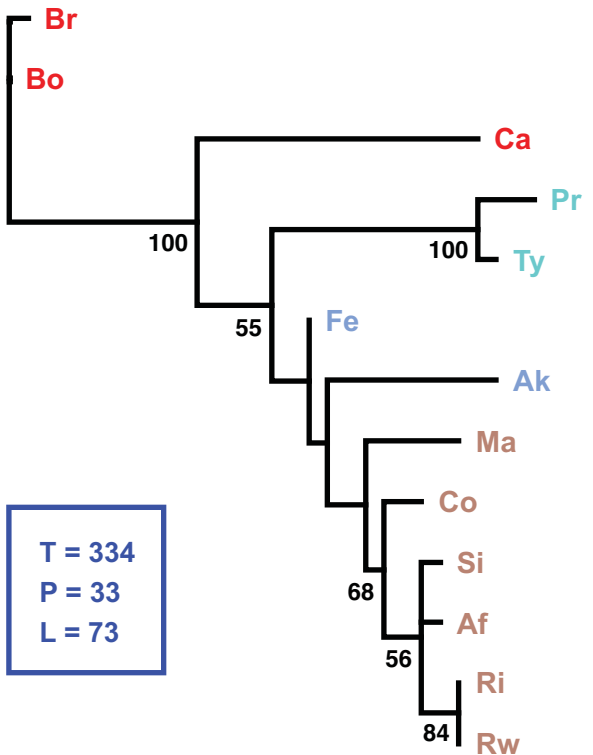

T = 334  
P = 33  
L = 73

— 5 aa changes

### *rvhB11*

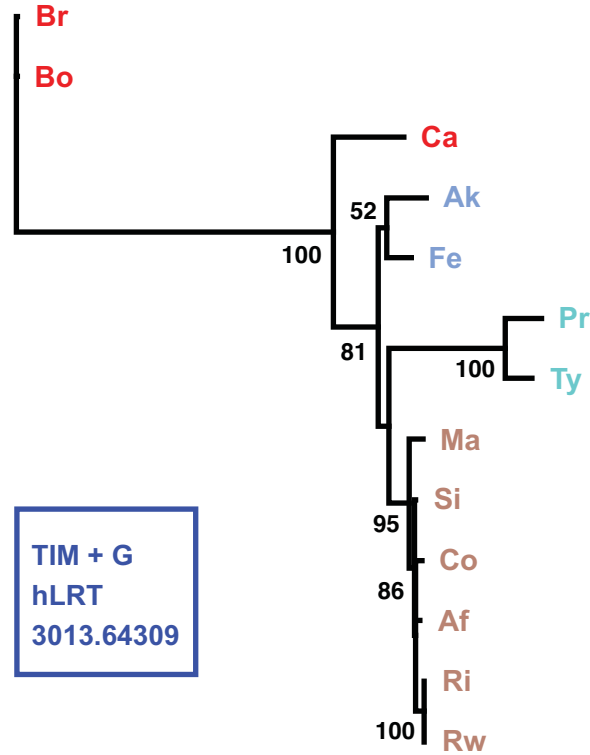

TIM + G  
hLRT  
3013.64309

— 0.01 substitutions/site

### RvhD4

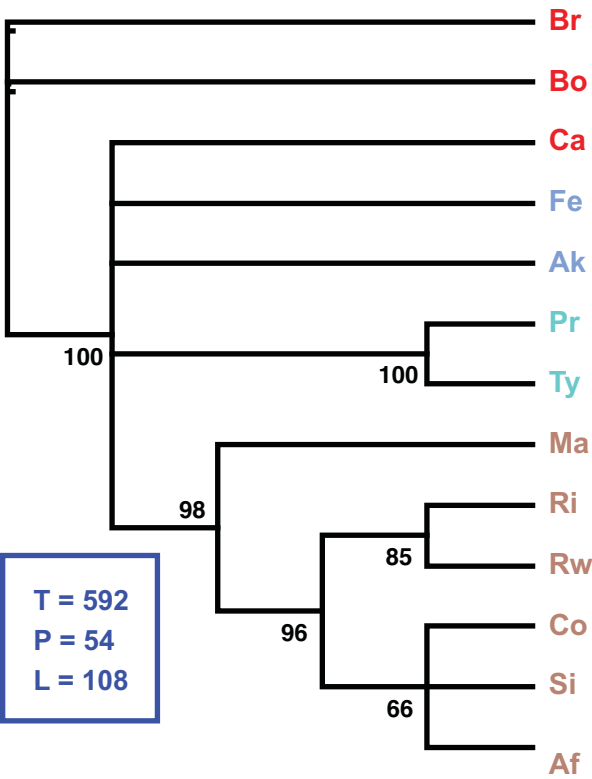

Strict consensus (6)

### *rvhD4*

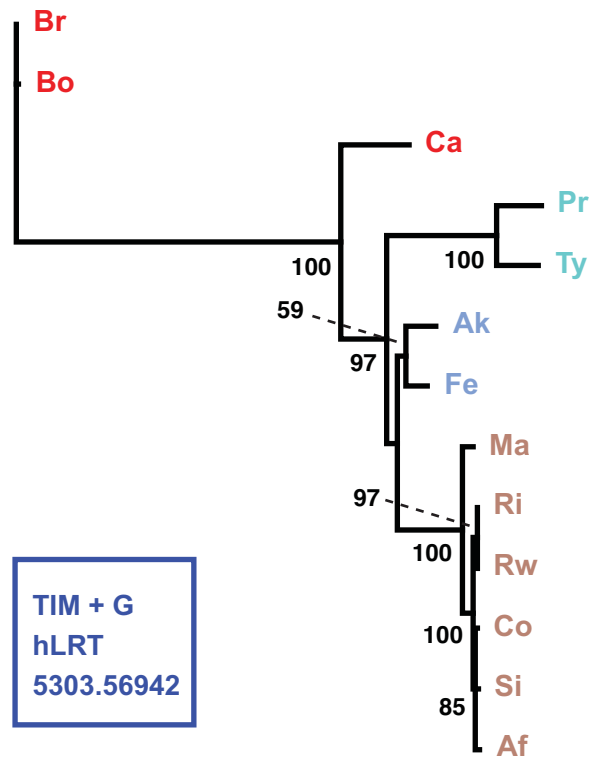

— 0.01 substitutions/site

### RvhB1

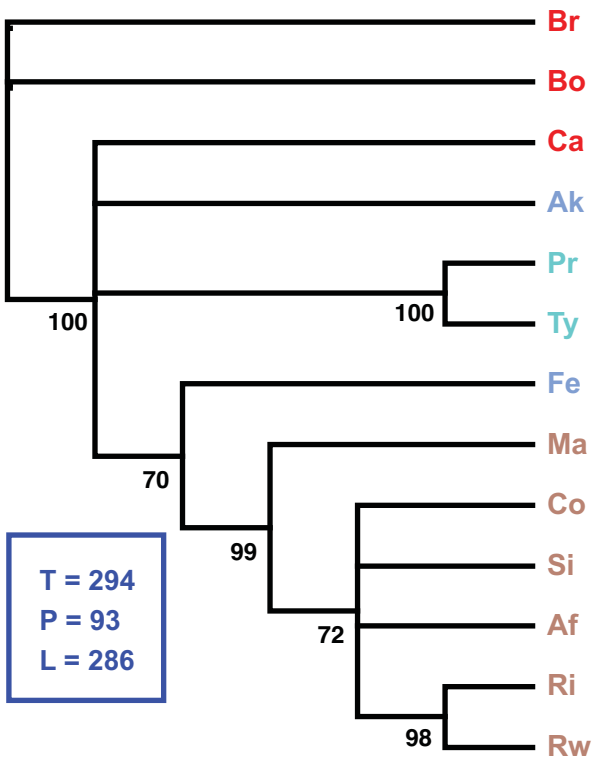

Strict consensus (15)

### *rvhB1*

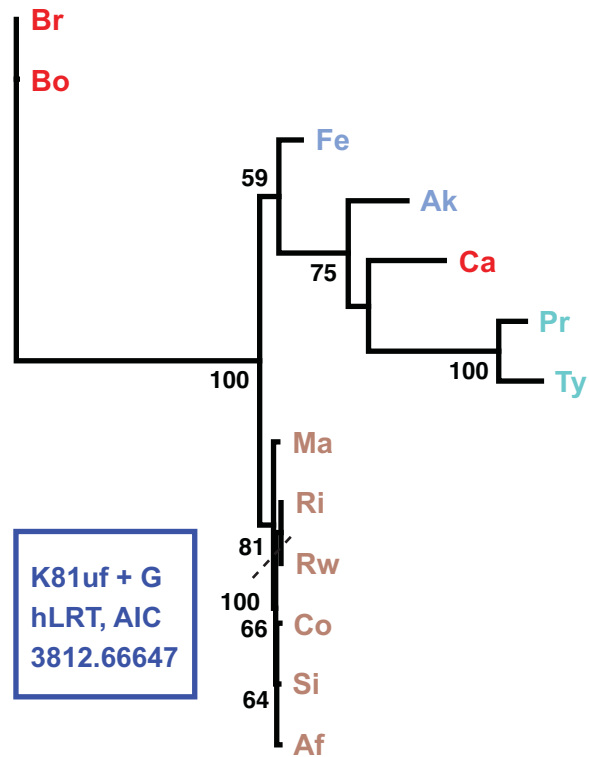

— 0.05 substitutions/site



### RvhB2

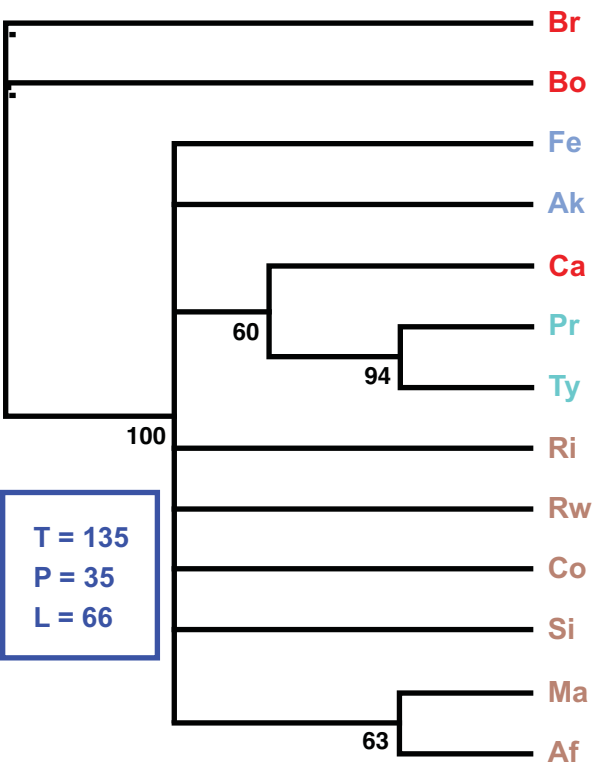

Strict consensus (27)

### *rvhB2*

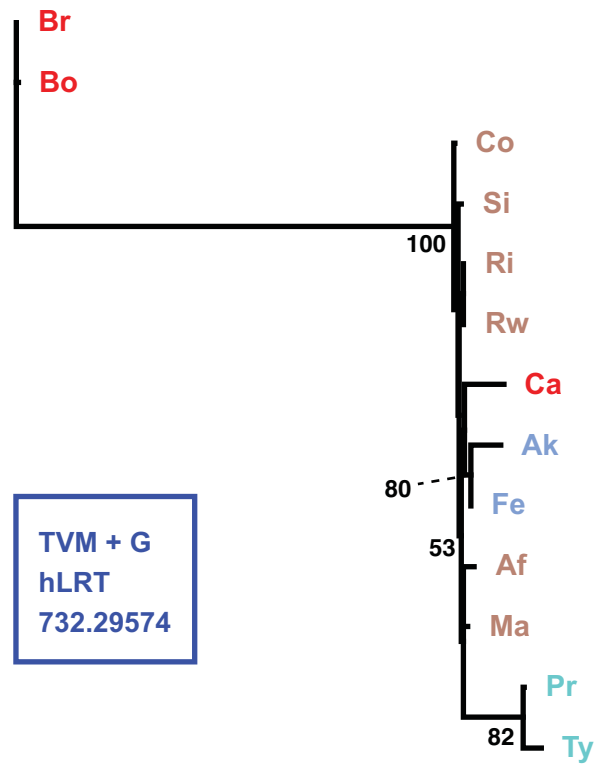

— 0.05 substitutions/site

### RvhB7

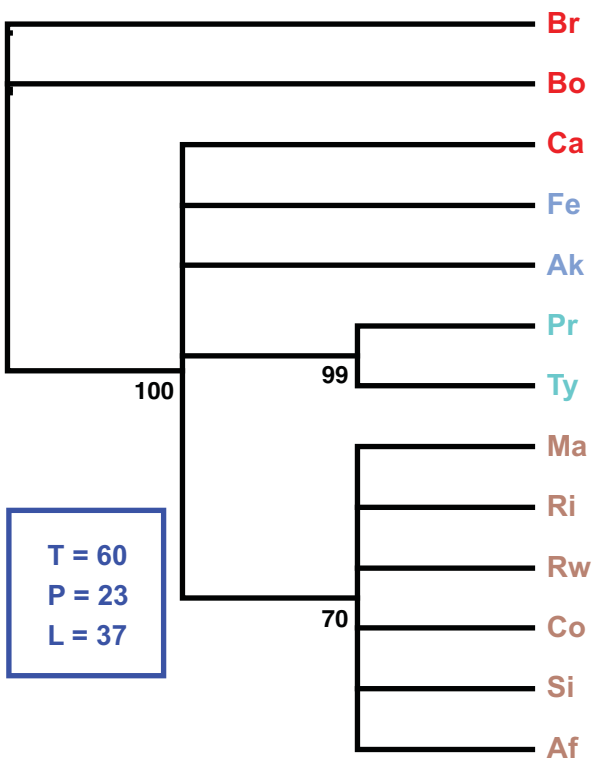

Strict consensus (11)

### *rvhB7*

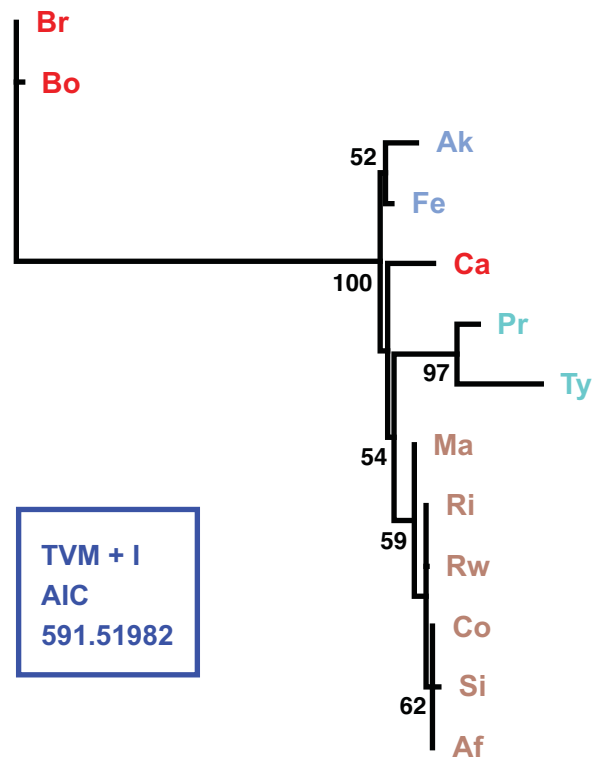

— 0.01 substitutions/site
